# Supplementary material for: Invited perspectives: “Natural hazard management, professional development and gender equity: let's get down to business”
Source: Copernicus journal article supplement (doi:10.5194/nhess-22-85-2022), 2022-01-19
Supplement: Supplementary file 1 [file nhess-22-85-2022-supplement.zip]

Archive with 2 entries (2 files):
- nhess-22-85-2022-supplement-title-page.pdf
- Table_1.xlsx
