# Supplementary material for: Invited perspectives: “Natural hazard management, professional development and gender equity: let's get down to business”
Source: Copernicus journal article supplement (doi:10.5194/nhess-22-85-2022), 2022-01-19
Supplement: Supplementary file 1 [file nhess-22-85-2022-supplement.zip › nhess-22-85-2022-supplement-title-page.pdf]

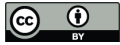

*Supplement of*

**Invited perspectives: “Natural hazard management, professional development and gender equity: let’s get down to business”**

**Valeria Cigala et al.**

*Correspondence to:* Valeria Cigala ([valeria.cigala@min.uni-muenchen.de](mailto:valeria.cigala@min.uni-muenchen.de)) and Giulia Roder ([giulia.roder@uniud.it](mailto:giulia.roder@uniud.it))

- [nhess-22-85-2022-supplement-title-page.pdf](#)
- [Table\\_1.xlsx](#)

The copyright of individual parts of the supplement might differ from the article licence.
