# Supplementary material for: Invited perspectives: “Natural hazard management, professional development and gender equity: let's get down to business”
Source: Copernicus journal article supplement (doi:10.5194/nhess-22-85-2022), 2022-01-19
Supplement: Supplementary file 1 [file Table_1.xlsx]

## Sheet: Categories and %
Dark grey: categories related to natural hazards and the disaster cycle
Light grey: categories related to the professional sphere
Q1: What is, in your opinion, the biggest challenge we are facing in the field of natural hazards?	Did not understand question. Did not respond.	Lack of proper political management, provison of resources and funding.	Lack of education, communication and outreach.	Lack of adaptation, weak resilience.	Lack of high quality data and data accessibility. Data dispersion. Lack of citizen science data implementation.	Lack of proper risk assessment and long term forecasting for climate change, weather extremes and anthropogenic impact on the environment.	Lack of forecast technologies and lack of early warning systems.	Progression of vulnerability: overpopulation and exploitation of natural resources. Inequalities and forced migration.	Lack of multidisciplinary research and solutions. Lack of sustainable measures related to specific conditions (cultural, social, geographical, economic).
Number of answers	9	33	17	22	12	54	16	20	34
% on total number of answers	7.37705	27.0492	13.9344	18.0328	9.83607	44.2623	13.1148	16.3934	27.8689
Q2 : What is the most important challenge you believe exists in the field of natural hazards with respect to gender?	Did not understand question. Did not respond.	Gender is not a problem.	Lack of inclusivity of minorities and potential differences related to gender in risk assessment (both in research and practice).	The higher vulnerability of women and children in certain socio-cultural enviroments.	Gap between theory and practice	Lack of female representation in leading positions and male dominance in decision-making bodies - disaster cycle related.	Lack of female representation in leading positions and male dominance - in the professional enviroment.	Cultural systemic inequities - disasyer cycle related.	Cultural systemic inequities - in the professional enviroment.	Challeges related to the professional enviroment. These include the subcategories below. In the main text the following subcategories are not discussed in details as they overlap with personal experiences (Q4).
Number of answers	9	8	22	15	1	23	46	15	14	44
% on total number of answers	7.37705	6.6	18.0328	12.2951	0.819672	18.8525	37.7049	12.2951	11.4754	36.1
							Women stereotyping and lack of credibility as professionals - in the professional enviroment.	Difficult fieldwork conditions, lack of recognition of specific needs - in the professional enviroment.	Lack of life-work balance in scientific career - in the professional enviroment.	Lack of fair recognition, presence of reward inequities and gender pay gap - in the professional enviroment.
						Number of answers	26	5	13	15
						% on total number of answers	21.3115	4.09836	10.6557	12.2951
Q3: What do you think is the most urgent solution or step change needed in the field of natural hazards specifically with respect to gender equity?	Did not understand question. Did not respond.	Rise visibility of the problem (collection of more disaggregated data).	Gender mainstreaming with leadership and inclusion in disaster management policies and practices.	Rise awareness on the issue, support education and empower women	Inclusion of gendered specific response and recovery measures	Promotion of gendered communication and inclusive language.	Culture of change beyond gender stereotypes - disaster cycle related.	Solutions for the professional enviroment (see below subcategories)
Number of answers	18	9	38	23	5	1	8	66
% on total number of answers	14.7541	7.37705	31.1475	18.8525	4.09836	0.819672	6.55738	54.0984
		Provide equal support and recognition. Change the reward structure, improve selection transparency and close the pay gap.	Hire more women especially in leading positions. Apply quotas rule and control its actual application.	Culture of change beyond gender stereotypes.	Promote mentorship and female role models. Engage more with female students.	Provide female specific funding and support. Motherhood support.	Provide a safe environment where women are really heard, believed and supported.	Promote a life-work balance.
	Number of answers	29	21	18	18	14	10	9
	% on 66 answers.	43.9394	31.8182	27.2727	27.2727	21.2121	15.1515	13.6364
Q4: Throughout your career path, did you experience any challenge that you relate specifically to your gender?	Did not answer.	Yes (without specification).	None.	Gender pay gap, position discrimination.	Mined life-work balance (actual or potential) enhancing the glass-ceiling or not.	Lack of credibility, development of imposter syndrome.	Lack of respect due to stereotypes and regardless of role.	Sexualization and harassment (leading to exclusion or not).	Issues related to culture, geography, age, language and ethnicity.	Exclusion of female necessities and from performing tasks in fieldwork and laboratory.	Experienced outside academia only.
Number of answers	4	6	28	34	18	34	29	17	12	9	1
% on total number of answers	3.27869	4.91803	22.9508	27.8689	14.7541	27.8689	23.7705	13.9344	9.83607	7.37705	0.819672
